# Supplementary figures and images for: Rapid contrast gain reduction following motion adaptation
Source: Oxford University Press journal article supplement (doi:10.1242/jeb.057539), 2011-11-09

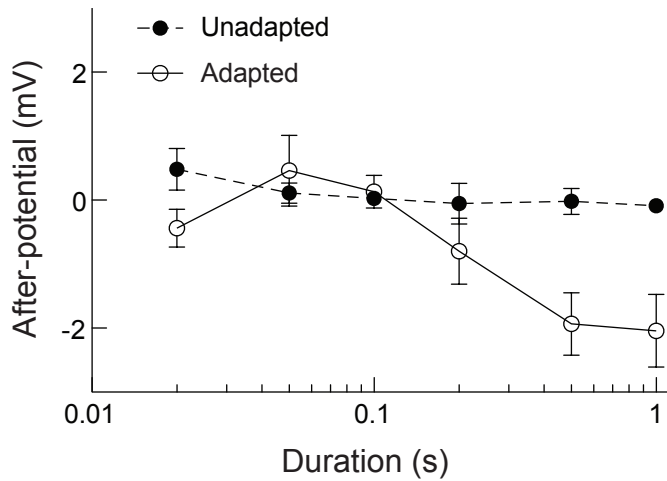

Supplement: jeb057539figs1.pdf [file jeb057539figs1.pdf]
